# Supplementary material for: Standardized Neurodevelopmental Surveillance of High-risk Infants Using Telehealth: Implementation Study during COVID-19
Source: PubMed Central journal article supplement — Pediatr Qual Saf. 2021 Jul 28;6(4):e439. doi: 10.1097/pq9.0000000000000439 (PMC8322542; doi:10.1097/pq9.0000000000000439), 2021-07-28
Supplement: pqs-6-e439-s001.pdf [file pqs-6-e439-s001.pdf]

Standardized Neurodevelopmental Surveillance of High-Risk Infants Using Telehealth: Implementation Study During COVID-19

Maitre, NL

SDC, Table

**Table, Supplemental Digital Content 1: Secondary Outcome: Provider\* Perception**

|                                                                                                                              | Strongly agree | Agree    | Neutral, disagree, strongly disagree | NA       |
|------------------------------------------------------------------------------------------------------------------------------|----------------|----------|--------------------------------------|----------|
| Zoom was easy to use                                                                                                         | 5 (83.3)       | 1 (16.7) | 0 (0.0)                              | 0 (0.0)  |
| The telehealth sessions were helpful to assess the patient's developmental status                                            | 3 (75.0)       | 1 (25.0) | 0 (0.0)                              | 0 (0.0)  |
| The telehealth sessions were helpful in formulating a plan for the patient's developmental progress                          | 6 (100.0)      | 0 (0.0)  | 0 (0.0)                              | 0 (0.0)  |
| The telehealth sessions were helpful in deciding on referral types essential for the patient's developmental progress        | 6 (100.0)      | 0 (0.0)  | 0 (0.0)                              | 0 (0.0)  |
| The telehealth sessions were helpful in deciding on diagnostic procedures essential for the patient's developmental progress | 2 (33.3)       | 2 (33.3) | 0 (0.0)                              | 2 (33.3) |
| The telehealth sessions were helpful in deciding on prescriptions essential for the patient's developmental progress         | 3 (50.0)       | 1 (16.7) | 0 (0.0)                              | 2 (33.3) |
| I felt that I could support the family in spite of the distance                                                              | 3 (50.0)       | 3 (50.0) | 0 (0.0)                              | 0 (0.0)  |
| I would recommend the telehealth visit to other providers                                                                    | 4 (66.7)       | 2 (33.3) | 0 (0.0)                              | 0 (0.0)  |
| I am satisfied with the overall quality of the telehealth visit                                                              | 3 (50.0)       | 3 (50.0) | 0 (0.0)                              | 0 (0.0)  |

NA, not applicable

Data are *n* (%), percentages may not add up to 100 because of rounding

\* 4 physicians, 1 occupational therapist, 1 physical therapist
